# Supplementary material for: Unveiling the enzymatic pathway of UMG-SP2 urethanase: insights into polyurethane degradation at the atomic level
Source: Royal Society of Chemistry journal article supplement (doi:10.1039/d4sc06688j), 2024-12-18
Supplement: d4sc06688j2.pdf [file d4sc06688j2.pdf]

# SUPPORTING INFORMATION

## Unveiling the Enzymatic Pathway of UMG-SP2 Urethanase: Insights into Polyurethane Degradation at the Atomic Level

Paiva, P.<sup>[1,2]</sup>, Teixeira, L.M.C.<sup>[1,2]</sup>, Wei, R.<sup>[3]</sup>, Liu, W.<sup>[4]</sup>, Weber, G.<sup>[5]</sup>, Morth, J.P.<sup>[2,6]</sup>, Westh, P.<sup>[2,6]</sup>, Petersen, A.R.<sup>[2,7]</sup>, Johansen, M.B.<sup>[2,7]</sup>, Sommerfeldt, A.<sup>[2,7]</sup>, Sandahl, A.<sup>[2,7]</sup>, Otzen, D. E.<sup>[2,8]</sup>, Fernandes, P.A.<sup>[1,2]</sup>, and Ramos, M.J.<sup>[1,2]</sup> \*

<sup>[1]</sup> LAQV@REQUIMTE, Departamento de Química e Bioquímica, Faculdade de Ciências, Universidade do Porto, Rua do Campo Alegre s/n, 4169-007, Porto, Portugal.

<sup>[2]</sup> EnZync Center for Enzymatic Deconstruction of Thermoset Plastics.

<sup>[3]</sup> Junior Research Group Plastic Biodegradation, Department of Biotechnology & Enzyme Catalysis, Institute of Biochemistry, University of Greifswald, Felix-Hausdorff-Str. 8, 17489 Greifswald, Germany.

<sup>[4]</sup> Tianjin Institute of Industrial Biotechnology, Chinese Academy of Sciences, 32 West Seventh Avenue, Tianjin Airport Economic Area, Tianjin 300308, China.

<sup>[5]</sup> Macromolecular Crystallography, Helmholtz-Zentrum Berlin, Alber-Einstein-Straße 15, 12489 Berlin, Germany.

<sup>[6]</sup> Department of Biotechnology and Biomedicine, Technical University of Denmark, Søtofts Plads, DK-2800, Kongens Lyngby, Denmark.

<sup>[7]</sup> Teknologisk Institut, DK-8000, Kongsvang Alle 29, Aarhus, Denmark.

<sup>[8]</sup> Interdisciplinary Nanoscience Center (iNANO). Aarhus University, Gustav Wieds Vej 14, DK - 8000 Aarhus, Denmark.

\* email: [mjramos@fc.up.pt](mailto:mjramos@fc.up.pt)

## UMG-SP2:DUE-MDA complex modeling

Table S1. List of predicted pK<sub>a</sub> values for titratable residues estimated by PROPKA 3.5.0.

| <b>Residue</b> | <b>pK<sub>a</sub></b> | <b>pK<sub>a</sub>-model</b> |
|----------------|-----------------------|-----------------------------|
| <b>Asp40</b>   | 2.6                   | 3.8                         |
| <b>Asp50</b>   | 5.3                   | 3.8                         |
| <b>Asp60</b>   | 3.8                   | 3.8                         |
| <b>Asp62</b>   | 4.0                   | 3.8                         |
| <b>Asp66</b>   | 3.8                   | 3.8                         |
| <b>Asp72</b>   | 3.3                   | 3.8                         |
| <b>Asp95</b>   | 5.0                   | 3.8                         |
| <b>Asp110</b>  | 3.1                   | 3.8                         |
| <b>Asp116</b>  | 3.0                   | 3.8                         |
| <b>Asp142</b>  | 3.6                   | 3.8                         |
| <b>Asp158</b>  | 2.5                   | 3.8                         |
| <b>Asp186</b>  | 1.9                   | 3.8                         |
| <b>Asp208</b>  | 3.3                   | 3.8                         |
| <b>Asp221</b>  | 3.8                   | 3.8                         |
| <b>Asp226</b>  | 5.2                   | 3.8                         |
| <b>Asp239</b>  | 5.5                   | 3.8                         |
| <b>Asp245</b>  | 3.4                   | 3.8                         |
| <b>Asp277</b>  | 3.9                   | 3.8                         |
| <b>Asp304</b>  | 4.0                   | 3.8                         |
| <b>Asp307</b>  | 3.2                   | 3.8                         |
| <b>Asp314</b>  | 4.2                   | 3.8                         |
| <b>Asp345</b>  | 4.0                   | 3.8                         |
| <b>Asp346</b>  | 3.3                   | 3.8                         |
| <b>Asp355</b>  | 4.6                   | 3.8                         |
| <b>Asp362</b>  | 2.9                   | 3.8                         |
| <b>Asp378</b>  | 3.8                   | 3.8                         |
| <b>Asp381</b>  | 3.4                   | 3.8                         |
| <b>Asp390</b>  | 3.0                   | 3.8                         |
| <b>Asp421</b>  | 2.9                   | 3.8                         |
| <b>Asp438</b>  | 5.0                   | 3.8                         |
| <b>Asp440</b>  | 4.5                   | 3.8                         |
| <b>Asp453</b>  | 4.1                   | 3.8                         |
| <b>Glu18</b>   | 4.0                   | 4.5                         |
| <b>Glu23</b>   | 3.8                   | 4.5                         |
| <b>Glu37</b>   | 3.9                   | 4.5                         |
| <b>Glu47</b>   | 4.7                   | 4.5                         |
| <b>Glu74</b>   | 4.1                   | 4.5                         |
| <b>Glu92</b>   | 5.2                   | 4.5                         |
| <b>Glu107</b>  | 4.3                   | 4.5                         |
| <b>Glu182</b>  | 7.0                   | 4.5                         |

|               |      |      |
|---------------|------|------|
| <b>Glu213</b> | 4.7  | 4.5  |
| <b>Glu273</b> | 3.9  | 4.5  |
| <b>Glu285</b> | 4.8  | 4.5  |
| <b>Glu292</b> | 4.8  | 4.5  |
| <b>Glu330</b> | 4.5  | 4.5  |
| <b>Glu333</b> | 4.7  | 4.5  |
| <b>Glu359</b> | 4.8  | 4.5  |
| <b>Glu379</b> | 4.3  | 4.5  |
| <b>Glu450</b> | 4.7  | 4.5  |
| <b>His108</b> | 5.8  | 6.5  |
| <b>His111</b> | 6.4  | 6.5  |
| <b>His157</b> | 5.7  | 6.5  |
| <b>His159</b> | 6.8  | 6.5  |
| <b>His196</b> | 4.3  | 6.5  |
| <b>His215</b> | 1.6  | 6.5  |
| <b>His271</b> | 4.6  | 6.5  |
| <b>His376</b> | 5.4  | 6.5  |
| <b>His439</b> | 6.4  | 6.5  |
| <b>Cys39</b>  | 11.3 | 9    |
| <b>Cys198</b> | 12.7 | 9    |
| <b>Cys291</b> | 11.5 | 9    |
| <b>Cys366</b> | 12.4 | 9    |
| <b>Tyr150</b> | 13.6 | 10   |
| <b>Tyr183</b> | 13.0 | 10   |
| <b>Tyr216</b> | 10.9 | 10   |
| <b>Tyr315</b> | 13.6 | 10   |
| <b>Tyr341</b> | 10.2 | 10   |
| <b>Tyr408</b> | 12.4 | 10   |
| <b>Lys69</b>  | 10.3 | 10.5 |
| <b>Lys81</b>  | 10.9 | 10.5 |
| <b>Lys91</b>  | 6.1  | 10.5 |
| <b>Lys124</b> | 10.3 | 10.5 |
| <b>Lys133</b> | 8.4  | 10.5 |
| <b>Lys204</b> | 6.6  | 10.5 |
| <b>Lys224</b> | 8.1  | 10.5 |
| <b>Lys249</b> | 11.0 | 10.5 |
| <b>Lys384</b> | 10.6 | 10.5 |
| <b>Arg45</b>  | 11.1 | 12.5 |
| <b>Arg49</b>  | 12.8 | 12.5 |
| <b>Arg59</b>  | 12.4 | 12.5 |
| <b>Arg63</b>  | 13.6 | 12.5 |
| <b>Arg65</b>  | 14.2 | 12.5 |
| <b>Arg80</b>  | 12.1 | 12.5 |
| <b>Arg122</b> | 12.0 | 12.5 |

|        |      |      |
|--------|------|------|
| Arg152 | 12.0 | 12.5 |
| Arg161 | 11.8 | 12.5 |
| Arg192 | 13.0 | 12.5 |
| Arg219 | 12.6 | 12.5 |
| Arg235 | 10.8 | 12.5 |
| Arg256 | 12.4 | 12.5 |
| Arg264 | 13.6 | 12.5 |
| Arg286 | 12.0 | 12.5 |
| Arg317 | 13.1 | 12.5 |
| Arg325 | 12.3 | 12.5 |
| Arg349 | 13.3 | 12.5 |
| Arg352 | 12.1 | 12.5 |
| Arg356 | 12.5 | 12.5 |
| Arg385 | 12.9 | 12.5 |
| Arg434 | 12.4 | 12.5 |
| Arg443 | 12.2 | 12.5 |
| Arg454 | 12.5 | 12.5 |

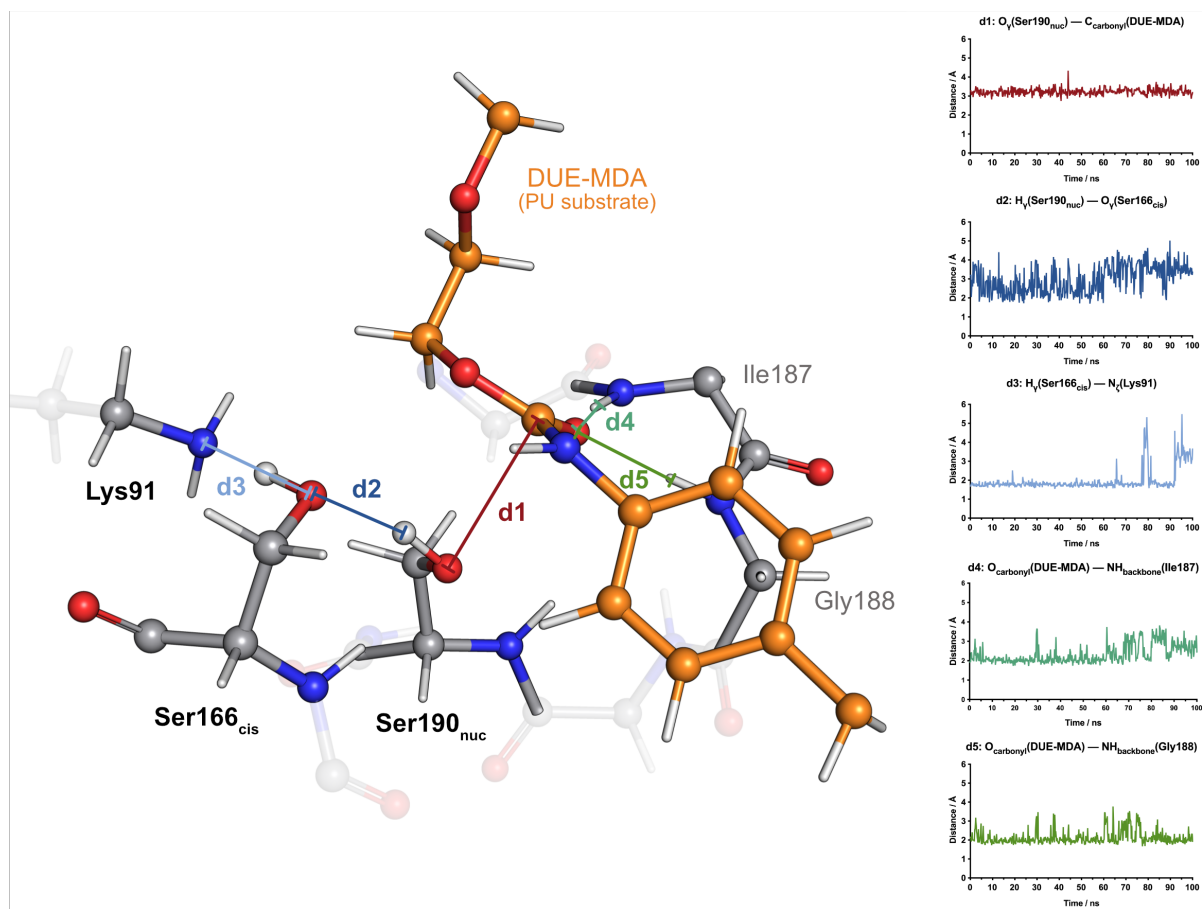

Figure S1. Catalytically relevant interatomic distances that were followed throughout the 100 ns-long production phase.

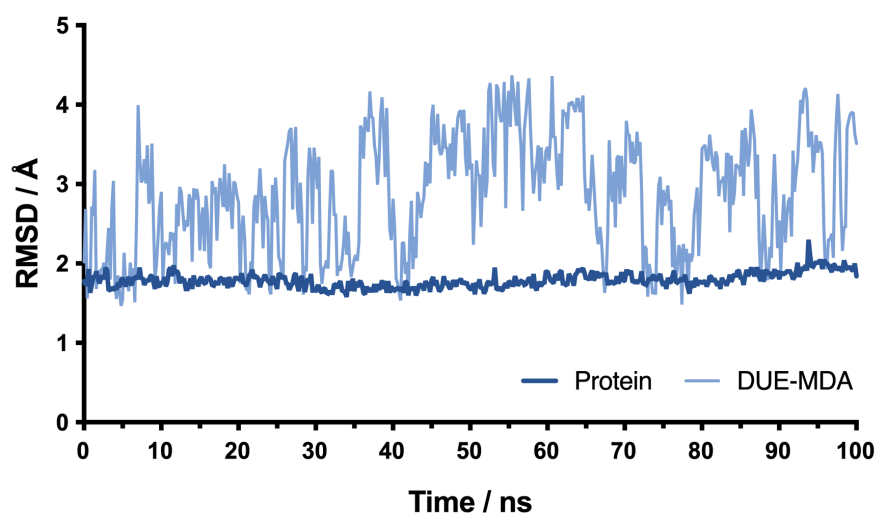

Figure S2. RMSD fluctuation of the protein (dark blue) and the DUE-MDA substrate (light blue) during the 100 ns-long production phase.

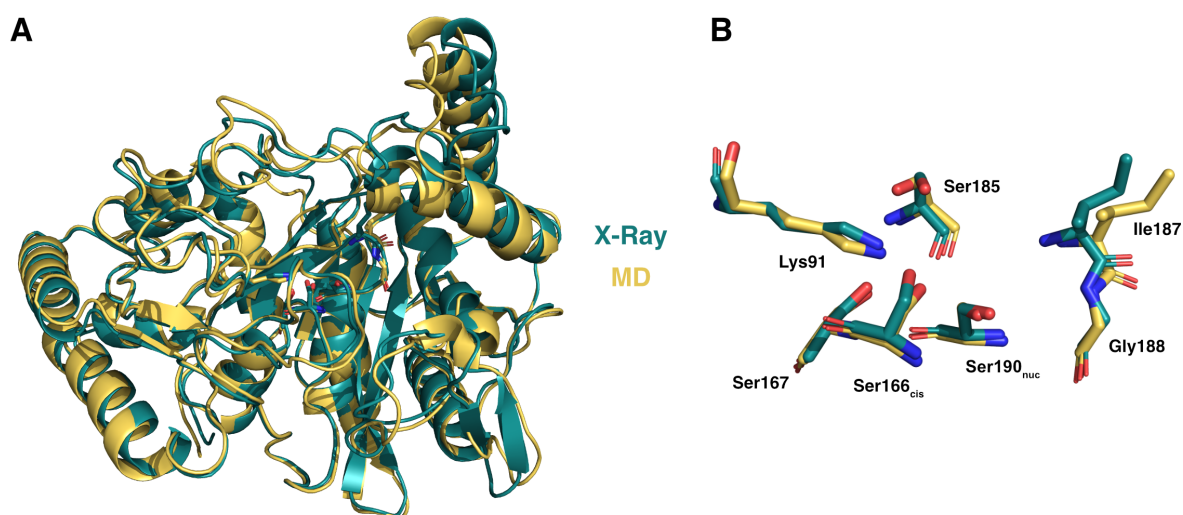

Figure S3. Structural alignment of the X-ray structure of UMG-SP2 complexed with the inhibitor phenylmethanesulfonyl fluoride (PDB ID: 8WDW) and the UMG-SP2's MD-gathered structure that was used in the QM/MM mechanistic study. Left: cartoon representation of the X-ray (teal) and MD-derived (gold) UMG-SP2 structures. The active site residues are represented as thick sticks. The phenylmethanesulfonyl fluoride inhibitor is not shown for clarity purposes. Right: close-up of the active site region, in which a selection of residues is shown as teal (x-ray) or gold (MD) sticks.

## Assessing the effect of different theoretical methods on the free energy profile

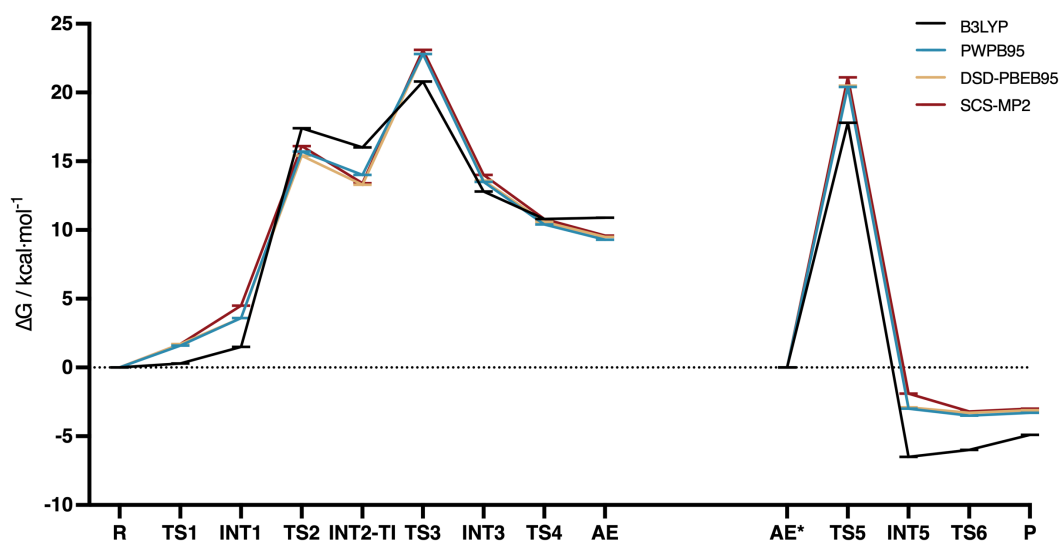

**Figure S4.** Free energy profiles for the UMG-SP2-catalyzed reaction, determined at different theoretical levels. The  $\Delta G$  values were determined using the B3LYP/6-31G(d)-D3(BJ):*ff*14SB-optimized geometries of each stationary state. The B3LYP single-point calculations used the 6-311+G(2d,2p) basis set and the D3(BJ) dispersion correction. The single-point calculations performed with the remaining theoretical methods were conducted with the def2-TZVPP basis set. The D3(BJ) dispersion correction was contemplated in the calculations performed with the PWPB95 and DSD-PBEB95 density functionals. The values are presented in kcal·mol<sup>-1</sup>.

**Table S2.**  $\Delta G$  values, determined at different theoretical levels. The calculations were performed using the B3LYP/6-31G(d)-D3(BJ):*ff*14SB-optimized geometries of each stationary state. The B3LYP single-point calculations used the 6-311+G(2d,2p) basis set and the D3(BJ) dispersion correction. The single-point calculations performed with the remaining theoretical methods were conducted with the def2-TZVPP basis set. The D3(BJ) dispersion correction was contemplated in the calculations performed with the PWPB95 and DSD-PBEB95 density functionals. The values are presented in kcal·mol<sup>-1</sup>.

| Stationary State | B3LYP | PWPB95 | DSD-PBEB95 | SCS-MP2 |
|------------------|-------|--------|------------|---------|
| R                | 0.0   | 0.0    | 0.0        | 0.0     |
| TS1              | 0.3   | 1.6    | 1.7        | 1.7     |
| INT1             | 1.5   | 3.6    | 3.6        | 4.5     |
| TS2              | 17.4  | 15.7   | 15.4       | 16.1    |
| INT2-TI          | 16.0  | 14.0   | 13.3       | 13.4    |
| TS3              | 20.8  | 22.8   | 22.8       | 23.1    |
| INT3             | 12.8  | 13.5   | 13.6       | 14.0    |
| TS4              | 10.8  | 10.4   | 10.6       | 10.8    |
| AE               | 10.9  | 9.3    | 9.5        | 9.6     |

|             |      |      |      |      |
|-------------|------|------|------|------|
| <b>AE*</b>  | 0.0  | 0.0  | 0.0  | 0.0  |
| <b>TS5</b>  | 17.8 | 20.4 | 20.5 | 21.1 |
| <b>INT5</b> | -6.5 | -3.0 | -2.9 | -1.9 |
| <b>TS6</b>  | -6.0 | -3.5 | -3.3 | -3.2 |
| <b>P</b>    | -4.9 | -3.3 | -3.1 | -3.0 |

We conducted single-point calculations using three additional theoretical methods to determine whether the calculated Gibbs free energy profile is independent of the density functional used (B3LYP): the double-hybrid-meta-GGA functional PWPB95, which has 50 % Hartree-Fock exchange; the double-hybrid-meta-GGA functional DSD-PBEB95, which has 66 % Hartree-Fock exchange; and the resolution identity spin-component-scaled second-order Møller–Plesset perturbation theory (SCS-MP2).

The calculated  $\Delta G$  values for the four theoretical methods were similar, suggesting that the overall Gibbs free energy landscape remained consistent. TS3 consistently remained as the rate-limiting TS of the overall reaction, with its energy fluctuating only slightly within the range of 20.8 to 23.1 kcal·mol<sup>-1</sup>.

## QM/MM study of the UMG-SP2 catalytic mechanism

**Table S3. Most relevant interatomic distances involved in the hydrolysis of the DUE-MDA PU substrate, determined at ONIOM(B3LYP/6-31G(d)-D3(BJ):ff14SB level of theory. The values are presented in Å.**

| <b>Stationary State</b> | $O_7(\text{Ser190}_{\text{nuc}})$<br>C <sub>carb</sub> (DUE-MDA) | $H_7(\text{Ser190}_{\text{nuc}})$<br>O <sub>7</sub> (Ser166 <sub>cis</sub> ) | $H_7(\text{Ser166}_{\text{cis}})$<br>N <sub>ζ</sub> (Lys91) | C <sub>carb</sub> (DUE-MDA)<br>O <sub>carb</sub> (DUE-MDA) | $O_7(\text{Ser167})$<br>N <sub>ζ1</sub> (Lys91) | $O_7(\text{Ser185})$<br>N <sub>ζ1</sub> (Lys91) | O <sub>carb</sub> (DUE-MDA)<br>NH(Ile187) | O <sub>carb</sub> (DUE-MDA)<br>NH(Gly188) |
|-------------------------|------------------------------------------------------------------|------------------------------------------------------------------------------|-------------------------------------------------------------|------------------------------------------------------------|-------------------------------------------------|-------------------------------------------------|-------------------------------------------|-------------------------------------------|
| <b>R</b>                | 2.72                                                             | 1.60                                                                         | 1.56                                                        | 1.34                                                       | 2.10                                            | 2.22                                            | 1.90                                      | 1.84                                      |
| <b>TS1</b>              | 2.69                                                             | 1.50                                                                         | 1.28                                                        | 1.34                                                       | 2.00                                            | 2.16                                            | 1.90                                      | 1.84                                      |
| <b>INT1</b>             | 2.65                                                             | 1.04                                                                         | 1.06                                                        | 1.34                                                       | 1.83                                            | 1.97                                            | 1.87                                      | 1.82                                      |
| <b>TS2</b>              | 1.69                                                             | 0.99                                                                         | 1.05                                                        | 1.42                                                       | 1.82                                            | 1.88                                            | 1.75                                      | 1.76                                      |
| <b>INT2-TI</b>          | 1.52                                                             | 0.99                                                                         | 1.04                                                        | 1.48                                                       | 1.79                                            | 1.86                                            | 1.73                                      | 1.76                                      |
| <b>TS3</b>              | 1.38                                                             | 1.19                                                                         | 1.07                                                        | 2.09                                                       | 1.84                                            | 1.89                                            | 1.89                                      | 1.80                                      |
| <b>INT3</b>             | 1.33                                                             | 1.61                                                                         | 1.14                                                        | 2.79                                                       | 1.93                                            | 1.98                                            | 2.17                                      | 1.76                                      |
| <b>TS4</b>              | 1.33                                                             | 1.67                                                                         | 1.25                                                        | 2.81                                                       | 1.99                                            | 2.06                                            | 2.21                                      | 1.77                                      |
| <b>AE</b>               | 1.33                                                             | 1.76                                                                         | 1.52                                                        | 2.82                                                       | 2.10                                            | 2.18                                            | 2.28                                      | 1.78                                      |
| <b>Stationary State</b> | $O_7(\text{Ser190}_{\text{nuc}})$<br>C <sub>carb</sub> (DUE-MDA) | H(Wat <sub>cat</sub> )<br>O <sub>7</sub> (Ser166 <sub>cis</sub> )            | $H_7(\text{Ser166}_{\text{cis}})$<br>N <sub>ζ</sub> (Lys91) | O(Wat <sub>cat</sub> )<br>C <sub>carb</sub> (DUE-MDA)      | $O_7(\text{Ser167})$<br>N <sub>ζ1</sub> (Lys91) | $O_7(\text{Ser185})$<br>N <sub>ζ1</sub> (Lys91) | O <sub>carb</sub> (DUE-MDA)<br>NH(Ile187) | O <sub>carb</sub> (DUE-MDA)<br>NH(Gly188) |
| <b>AE*</b>              | 1.33                                                             | 1.85                                                                         | 1.54                                                        | 3.32                                                       | 2.01                                            | 2.15                                            | 2.20                                      | 1.79                                      |
| <b>TS5</b>              | 1.40                                                             | 1.32                                                                         | 1.09                                                        | 1.89                                                       | 1.88                                            | 1.93                                            | 1.85                                      | 1.80                                      |
| <b>INT5</b>             | 2.55                                                             | 1.03                                                                         | 1.05                                                        | 1.33                                                       | 1.87                                            | 1.94                                            | 1.77                                      | 1.76                                      |
| <b>TS6</b>              | 2.60                                                             | 1.46                                                                         | 1.30                                                        | 1.33                                                       | 2.05                                            | 2.13                                            | 1.79                                      | 1.78                                      |
| <b>P</b>                | 2.62                                                             | 1.55                                                                         | 1.54                                                        | 1.33                                                       | 2.13                                            | 2.19                                            | 1.80                                      | 1.78                                      |



## Contribution of individual residues to the activation energy

**Table S4. Reference carbon atoms.** The table presents the residue-specific carbon atoms, defined as the reference atoms used to measure the distance of the given residue to the  $O_{\text{ester}}(\text{DUE-MDA})$  and  $O_{\gamma}(\text{Ser190}_{\text{nuc}})$ .

| <b>Residue</b>    | <b>Reference atom</b>         |
|-------------------|-------------------------------|
| <b>Nonpolar</b>   | $C_{\alpha}$                  |
| <b>Arginine</b>   | $C_{\zeta}$                   |
| <b>Asparagine</b> | $C_{\gamma}$                  |
| <b>Aspartate</b>  | $C_{\gamma}$                  |
| <b>Cysteine</b>   | $C_{\beta}$                   |
| <b>Glutamine</b>  | $C_{\delta}$                  |
| <b>Glutamate</b>  | $C_{\delta}$                  |
| <b>Histidine</b>  | $C_{\delta 2}/C_{\epsilon 1}$ |
| <b>Lysine</b>     | $C_{\epsilon}$                |
| <b>Methionine</b> | $C_{\beta}$                   |
| <b>Threonine</b>  | $C_{\beta}$                   |
| <b>Tyrosine</b>   | $C_{\beta}$                   |
